# Supplementary material for: Heterointerfaces of nickel sulphides and selenides on Ni-foam as efficient bifunctional electrocatalysts in acidic environments
Source: Royal Society of Chemistry journal article supplement (doi:10.1039/d2ta01630c), 2022-01-01
Supplement: d2ta01630c1.pdf [file d2ta01630c1.pdf]

# Supporting Information

## Heterointerfaces of Nickel Sulphides and Selenides on Ni-foam as Efficient Bifunctional Electrocatalyst in Acidic Environment

Naznin Shaikh<sup>1</sup>, Indrajit Mukhopadhyay<sup>1</sup>, Abhijit Ray<sup>1\*</sup>

<sup>1</sup>Department of Solar Energy, School of Technology, Pandit Deendayal Energy University, Raisan, Gandhinagar – 382426

\*Corresponding Author Email: [abhijit.ray@sse.pdpu.ac.in](mailto:abhijit.ray@sse.pdpu.ac.in)

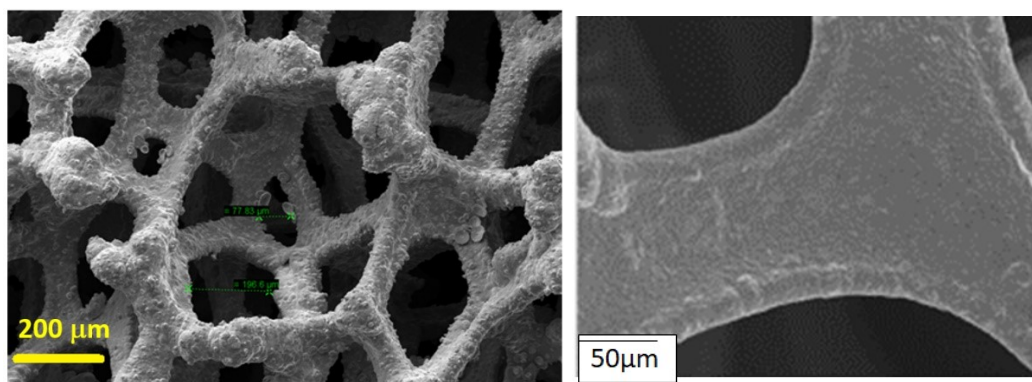

**Figure S1:** FE-SEM image of the Ni-foam used (low and high magnifications).

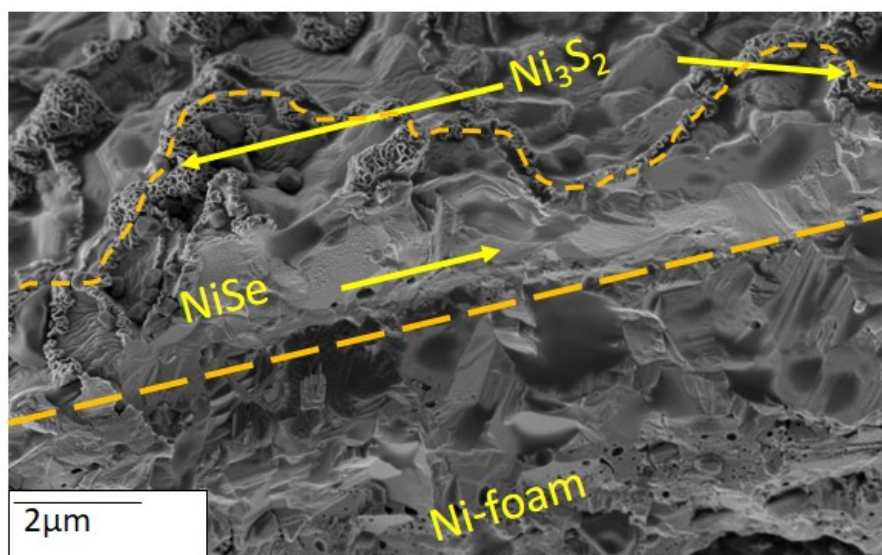

**Figure S2:** Cross sectional FE-SEM images of the heterointerface electrode NX600C.

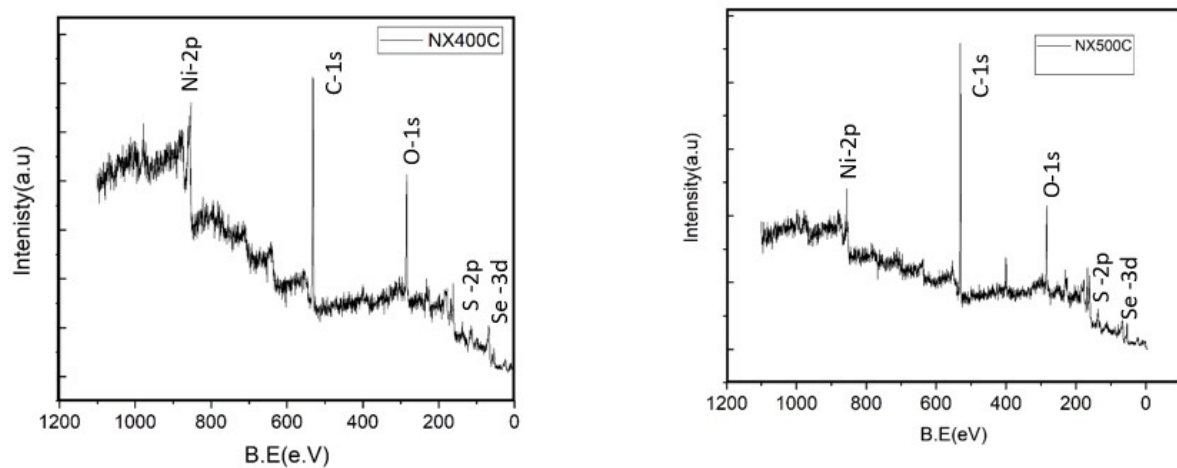

**Figure S3:** XPS survey spectra for samples NX400C and NX500C.

(a)

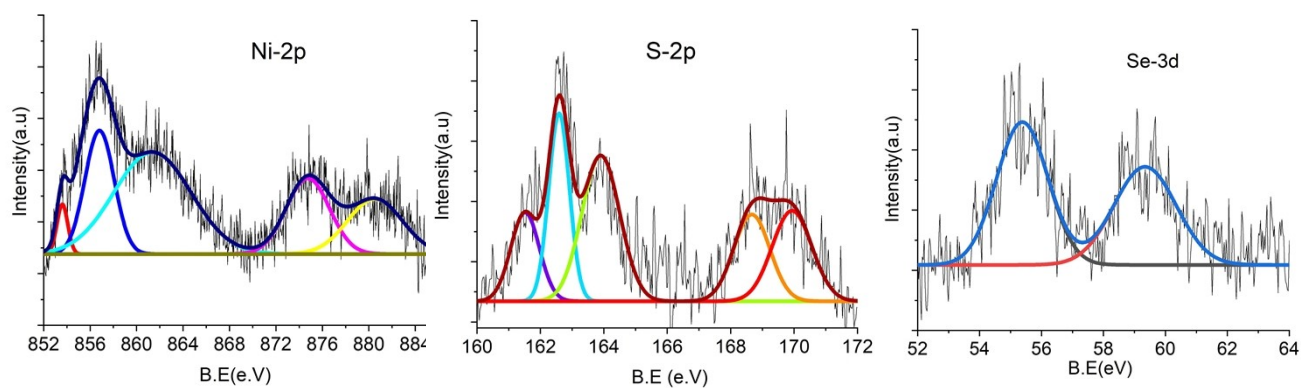

(b)

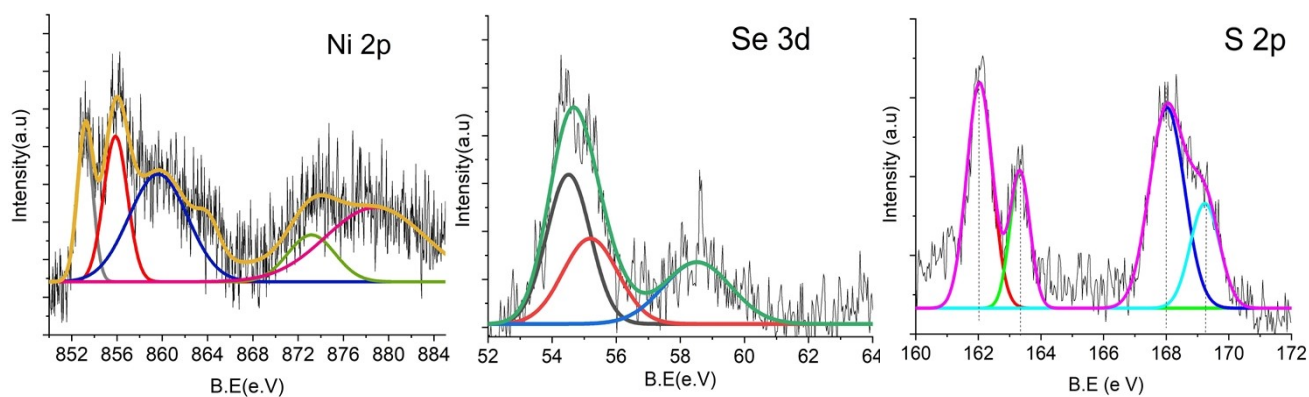

**Figure S4:** High resolution XPS spectra for samples NX400C (a) and NX500C (b).

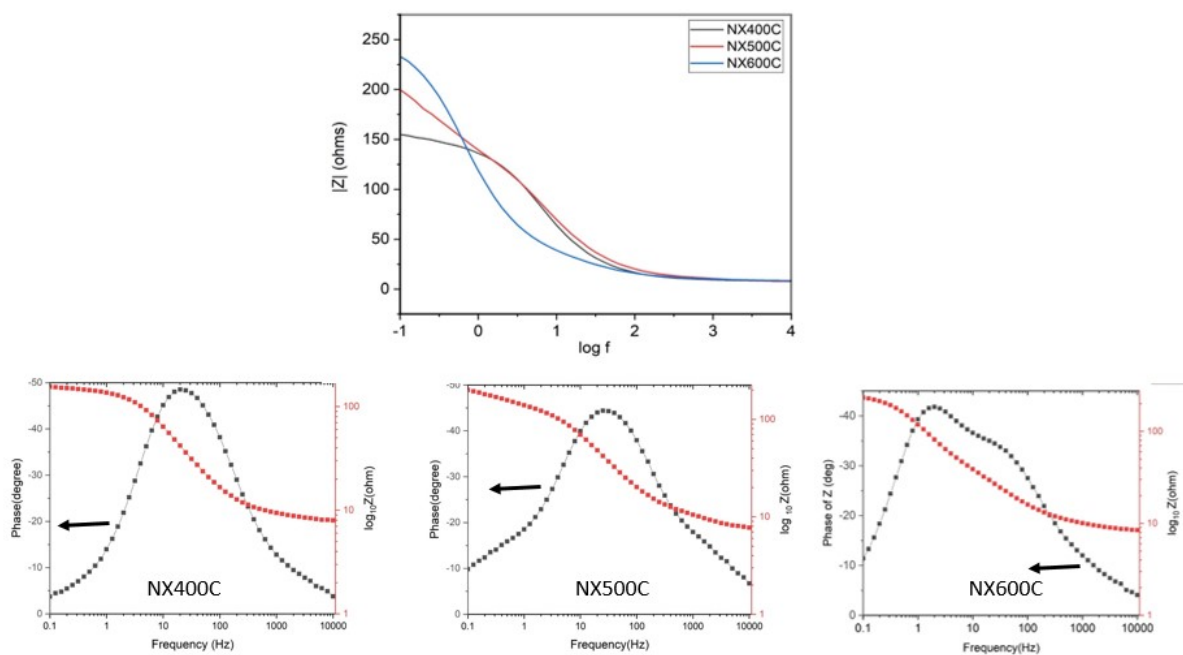

**Figure S5:** The Bode amplitude and phase plots.

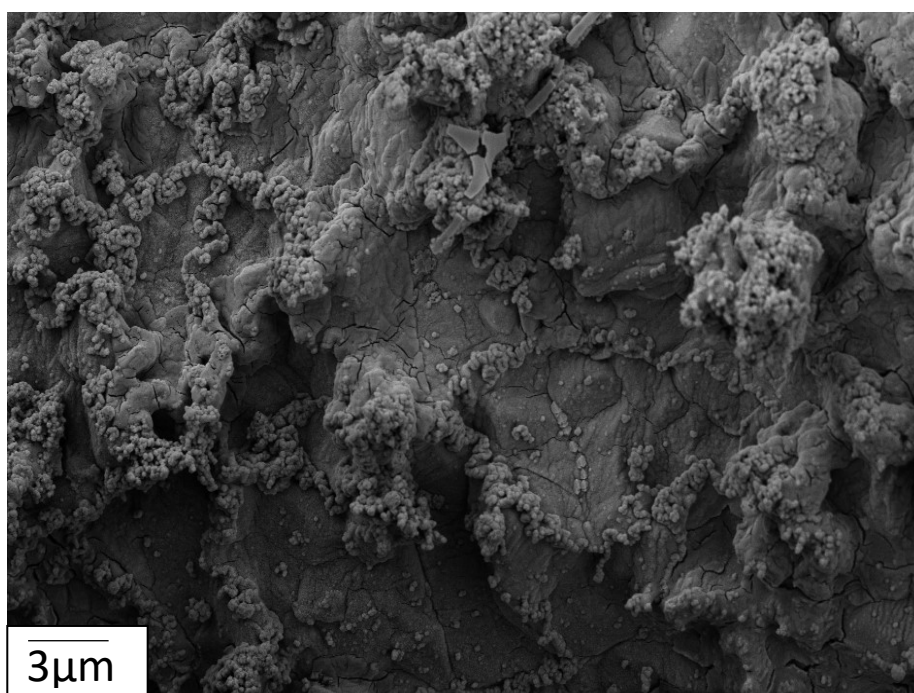

**Figure S6:** Morphology (FE-SEM image) of the NX600C electrode after 18hr of stability test.

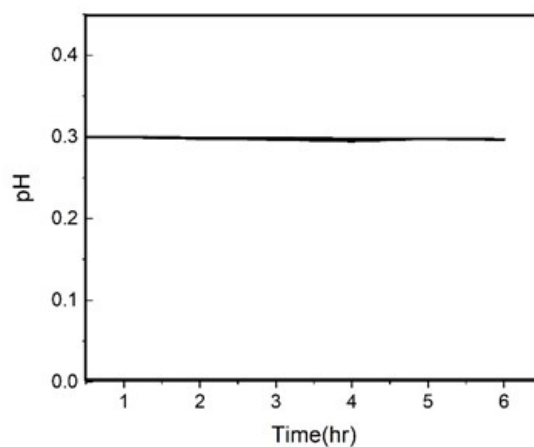

**Figure S7:** Variation of pH under OER stability test.

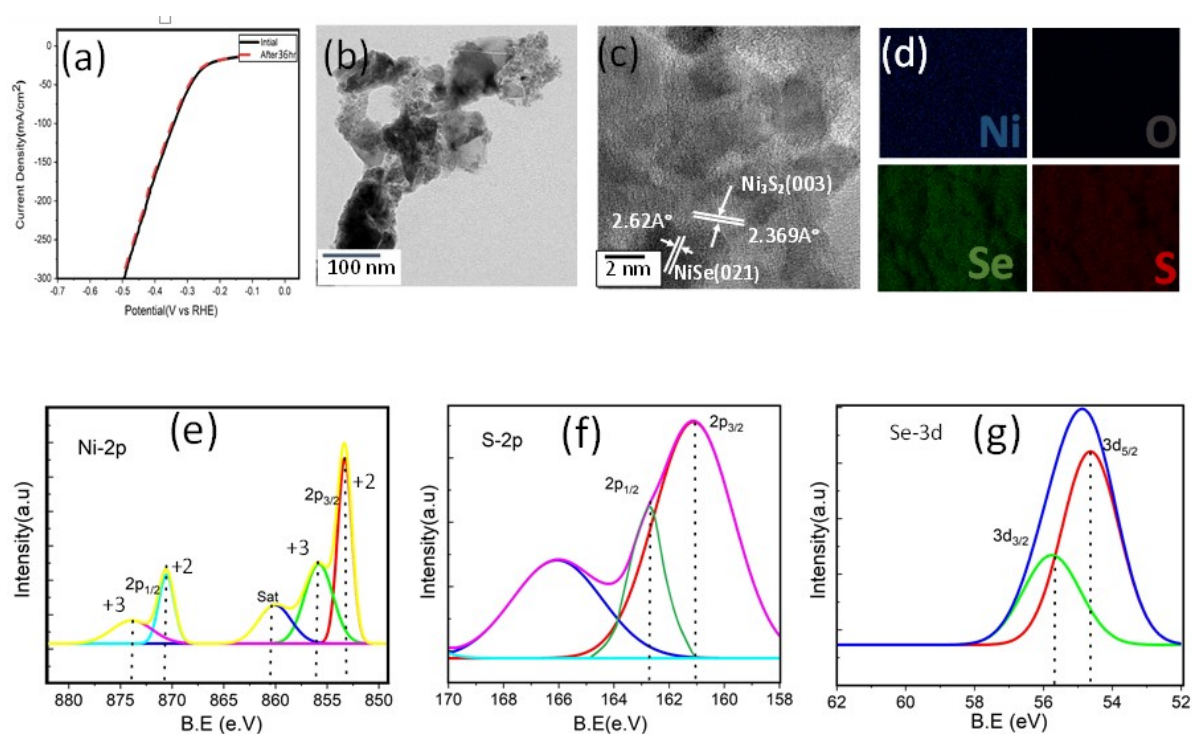

**Figure S8:** LSV curve before and after the stability test of 36 h of HER (a); TEM (b,c) images, EDX elemental mapping (d) and XPS spectra (e-g) after the test of NX600C.



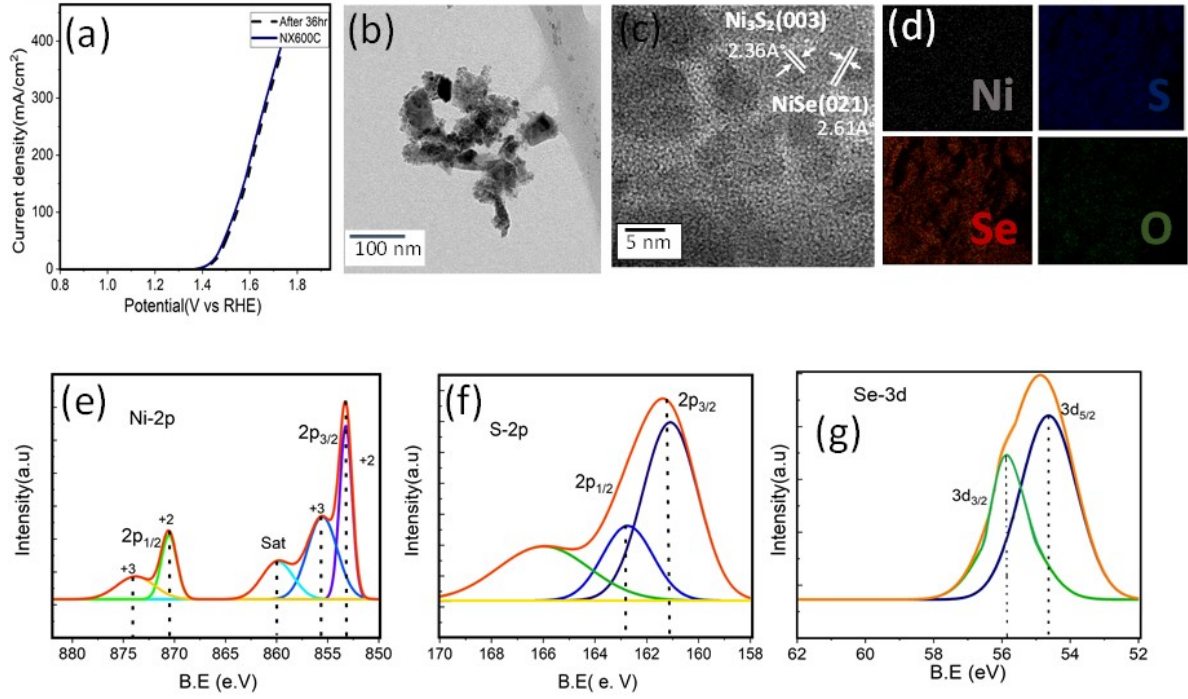

**Figure S9:** LSV curve before and after the stability test of 36 h of OER (a); TEM (b,c) images, EDX elemental mapping (d) and XPS spectra (e-g) after the test of NX600C.

## S1. Methods of calculation of Turnover Frequency (TOF)

Turn Over Frequency accurately signifies the catalytic activity of a catalyst. The electrocatalytic performances of all our catalyst were calculated as per the previous study [1], TOF is calculated as per the below equation,

$$\text{TOF} = \frac{\text{Total hydrogen (or oxygen) turn overs/geometric area (cm}^2\text{)}}{\text{\# Surface active sites/geometric area (cm}^2\text{)}} \quad (1)$$

The Final TOF plot is obtained from the LSV curve of the electrocatalyst by the following equation

$$\text{TOF}_{\text{HER}} = \frac{3.12 \times 10^{15} \frac{\text{H}_2\text{s}^{-1}}{\text{cm}^2} \text{ per } \frac{\text{mA}}{\text{cm}^2} \times |j|}{\text{\#Surface active sites} \times A_{\text{ECSA}}} \quad (2)$$

$$\text{TOF}_{\text{OER}} = \frac{1.56 \times 10^{15} \frac{\text{O}_2\text{s}^{-1}}{\text{cm}^2} \text{ per } \frac{\text{mA}}{\text{cm}^2} \times |j|}{\text{\#Surface active sites} \times A_{\text{ECSA}}} \quad (3)$$

Where  $|j|$  is the current density in mA/cm<sup>2</sup>,

$$\text{Surface active sites} = \left( \frac{\text{Atoms per unit cell}}{\text{Volume } \text{\AA}^3 \text{ per unit cell}} \right)^{\frac{2}{3}} \quad (4)$$

$$A_{\text{ECSA}} = \frac{C_{\text{dl}} - \text{electrocatalyst (mF/cm}^2\text{)}}{C_{\text{dl}} - \text{NF (mF/cm}^2\text{) per ECSA cm}^2}$$

(5)

**Table S1:** WD-XRF analysis report for NX600C

| Sr. No | Test Parameter | Concentration (%) |
|--------|----------------|-------------------|
| 1      | S              | 26.823            |
| 2      | Ni             | 37.45             |
| 3      | Se             | 35.727            |

**Reference:**

[1] He et al., (2021). *Rational Design of Vanadium-Modulated Ni<sub>3</sub>Se<sub>2</sub> Nanorod@ Nanosheet Arrays as a Bifunctional Electrocatalyst for Overall Water Splitting*. ACS Sustainable Chemistry & Engineering, 9(35), 12005-12016.
